# Supplementary material for: Layer-by-layer self-assembly of a sandwich-like graphene wrapped SnOx@graphene composite as an anode material for lithium ion batteries
Source: Royal Society of Chemistry journal article supplement (doi:10.1039/c4ta00495g), 2014-01-01
Supplement: c4ta00495g1.pdf [file c4ta00495g1.pdf]

## Supporting Information

Layer-by-layer self-assembly of sandwich-like graphene wrapped SnO<sub>x</sub>@graphene  
composite as anode material for lithium ion batteries

Jingjing Tang,<sup>a</sup> Juan Yang,<sup>a</sup> Limin Zhou,<sup>b</sup> Jing Xie,<sup>a</sup> Guanghui Chen,<sup>a</sup> and Xiangyang  
Zhou<sup>\*a</sup>

*<sup>a</sup>School of Metallurgical Science and Engineering, Central South University,  
Changsha, 410083, China*

*<sup>b</sup>Department of Mechanical and Engineering, The Hong Kong Polytechnic University,  
Hong Kong, China*

\*Corresponding author. E-mail: hncsyjy308@163.com

### **Experimental section**

#### **Materials and Reagents:**

Graphite powder (purity>99.99%), Sulfuric acid (95-98%, AR grade), sodium nitrate (AR grade), potassium permanganate (AR grade), hydrogen peroxide (30%, AR grade), hydrochloric acid (36-38%, AR grade), ammonium hydroxide (25-28%, AR grade), hydrazine (80%, AR grade), SnCl<sub>2</sub>•2H<sub>2</sub>O (AR grade), polydiallyldimethylammonium chloride (PDDA, average Mw=100,000~200,000, 20 wt% in water, Aldrich). All reagents are used as received.

#### **Material Synthesis:**

**Synthesis of graphene oxide (GO).** Graphite oxide was synthesized from graphite powder based on modified Hummer's method [1]. Typically, under magnetic stirring

in a ice bath, 1 g of  $\text{NaNO}_3$  and 1 g of graphite powder were put into cold concentrated  $\text{H}_2\text{SO}_4$  (50 ml). Then 5 g of  $\text{KMnO}_4$  was added gradually under stirring. The ice bath reaction was allowed to continue for 4 h. Then, the mixture was stirred at  $35\text{ }^\circ\text{C}$  for 4 h. Then deionized water (100 ml) was gradually added under extensive stirring to keep the temperature below  $70\text{ }^\circ\text{C}$ . The temperature of the water bath was increased to  $90\text{ }^\circ\text{C}$  and maintained for 2 h to increase the degree of oxidation of the product. The obtained bright yellow suspension was diluted with deionized water (100 ml) and further treated with 5 ml of  $\text{H}_2\text{O}_2$  to reduce the residual  $\text{KMnO}_4$ . Finally, graphite oxide was obtained by centrifugation with diluted  $\text{HCl}$  and abundant deionized water. As-prepared graphite oxide was dispersed in deionized water by ultrasonication for 2 h to get the homogeneous GO aqueous with a concentration of  $0.2\text{ mg ml}^{-1}$  to be used.

**Synthesis of  $\text{SnO}_2@\text{G}$ .** After the dissolution of  $\text{SnCl}_2\cdot 2\text{H}_2\text{O}$  (2 g) in GO dispersion, the mixture was magnetically stirred at  $90\text{ }^\circ\text{C}$  for 0.5 h. And then ammonia was added drop by drop to adjust the pH value of the dispersion to neutral to get  $\text{SnO}_2@\text{GO}$ . The resulting black filter cake was dissolved in deionized water after vacuum filtration and washing. After the addition of 5 ml of  $\text{NH}_3\cdot\text{H}_2\text{O}$  and 0.2 ml of  $\text{N}_2\text{H}_4\cdot\text{H}_2\text{O}$ , the mixture was further stirred for 2 h at  $95\text{ }^\circ\text{C}$ .  $\text{SnO}_2@\text{G}$  was collected as black precipitate, washed several times with deionized water and dried.

**Synthesis of  $\text{SnO}_x@\text{G/G}$ .** After the dissolution of  $\text{SnCl}_2\cdot 2\text{H}_2\text{O}$  (2 g) in GO dispersion, the mixture was magnetically stirred at  $90\text{ }^\circ\text{C}$  for 0.5 h. And then ammonia was added drop by drop to adjust the pH value of the dispersion to neutral to get

SnO<sub>2</sub>@GO. The resulting black filter cake was dissolved in deionized water after vacuum filtration and washing. To prepare positively charged SnO<sub>2</sub>@GO (p-SnO<sub>2</sub>@GO), 2 ml of PDDA (polydiallyldimethylammonium chloride, average Mw=100,000~200,000, 20 wt% in water, Aldrich) was transferred into SnO<sub>2</sub>@GO solution and stirred for 10 h. p-SnO<sub>2</sub>@GO was obtained after vacuum filtration and washing. Subsequently, p-SnO<sub>2</sub>@GO was dispersed into homogeneous GO aqueous and the mixture was stirred for 2 h. After the addition of 5 ml of NH<sub>3</sub>•H<sub>2</sub>O and 0.2 ml of N<sub>2</sub>H<sub>4</sub>•H<sub>2</sub>O, the mixture was further stirred for 2 h at 95 °C. Sandwich-like SnO<sub>x</sub>@G/G was collected as black precipitate, washed several times with deionized water and dried.

#### **Characterization:**

Scanning electron microscopy (QUANTA FEG 250, AMERICA) and transmission electron microscopy (TEM, Titan G2 60-300, HOLLAND) were used to characterize the materials. Thermo-gravimetric analysis (TGA) was conducted with a heating rate of 10 °C min<sup>-1</sup> using a SDTQ600 in air. The crystal structures of samples were measured by X-ray powder diffraction (XRD, Rigaku-TTRIII, Cu K $\alpha$ ) at a scanning rate of 10° min<sup>-1</sup>. X-ray photoelectron spectra (XPS) were recorded using an X-ray photoelectron spectrometer (K-Alpha 1063) with a monochromatic Al K $\alpha$  X-ray source. Fourier transform infrared spectroscopy (FT-IR) spectra were recorded on a Nicolet 6700 spectrometer.

#### **Electrochemical measurement:**

Working electrodes were fabricated by mixing the synthesized samples, acetylene

carbon black and polyvinylidene fluoride (PVDF) binder dissolved in N-methyl-2-pyrrolidone (NMP) at a weight ratio of 80:10:10. The mixed slurry was then coated onto a copper foil and dried overnight at 120 °C in a vacuum oven prior to assembling the customized test cell, which employed a lithium foil as the counter electrode and 1M LiPF<sub>6</sub> in ethylene carbonate/dimethyl carbonate/diethyl carbonate (1:1:1) as the electrolyte. Cells were assembled in an ultra pure argon filled glove box (Super 1220/750, Shanghai Mikrouna Co. Ltd). Galvanostatic discharging/charging was carried out on a LAND CCT-2001A in the potential range 0.005-3 V versus Li/Li<sup>+</sup> at a certain current density value. Cyclic voltammograms (CV) experiment was performed on an electrochemical workstation (CHI660E) over the potential range 0.005-3 V versus Li/Li<sup>+</sup> at a scanning rate of 0.5 mV s<sup>-1</sup>.

**Table S1** Comparison of the electrochemical performance of SnO<sub>x</sub>/graphene based on previous literatures.

| Sample                  | The content of SnO <sub>x</sub> | Electrochemical data                 |                     |                                                  |                                               |                                                           |                                                            | Ref. No. |
|-------------------------|---------------------------------|--------------------------------------|---------------------|--------------------------------------------------|-----------------------------------------------|-----------------------------------------------------------|------------------------------------------------------------|----------|
|                         |                                 | Current density / mA g <sup>-1</sup> | Potential range / V | Initial discharge capacity / mAh g <sup>-1</sup> | Initial charge capacity / mAh g <sup>-1</sup> | Reversible capacity after 50 cycles / mAh g <sup>-1</sup> | Reversible capacity after 100 cycles / mAh g <sup>-1</sup> |          |
| SnO <sub>2</sub> /G     | 75.64%                          | 100                                  | 0.01-3.00           | 1870                                             | 1133                                          | 389                                                       | -                                                          | [2]      |
| SnO <sub>2</sub> /G/C   | 68.12%                          | 100                                  | 0.01-3.00           | 1828                                             | 1285                                          | ~700                                                      | ~630                                                       | [2]      |
| SnO/SnO <sub>2</sub> /G | ~95%                            | 100                                  | 0.0-2.0             | 1343                                             | 575.9                                         | -                                                         | -                                                          | [3]      |
| SnO <sub>2</sub> @G@G   | 90%                             | 80                                   | 0.01-2.00           | 1705.5                                           | 1050.6                                        | -                                                         | ~590                                                       | [4]      |
| SnO <sub>2</sub> /G     | ~68%                            | 100                                  | 0.01-2.0            | 1662                                             | 819                                           | -                                                         | ~600                                                       | [5]      |
| SnO <sub>2</sub> /G     | -                               | 100                                  | 0.0-3.0             | -                                                | 1306                                          | 594                                                       | -                                                          | [6]      |
| SnO <sub>2</sub> /G     | ~78%                            | 78.2                                 | 0.01-3              | 1526.9                                           | 977.2                                         | ~507.9                                                    | -                                                          | [7]      |
| SnO <sub>2</sub> /G     | -                               | 50                                   | 0.05-3              | ~1400                                            | ~975                                          | ~975                                                      | -                                                          | [8]      |

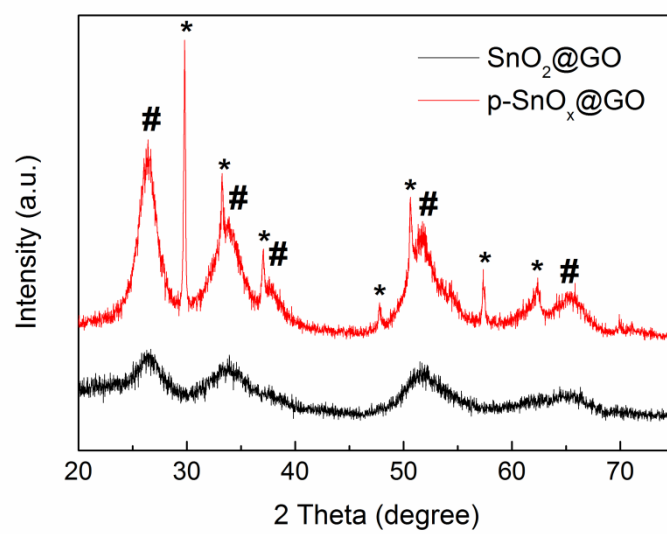

**Fig. S1** XRD pattern of SnO<sub>2</sub>@GO and p-SnO<sub>x</sub>@GO.

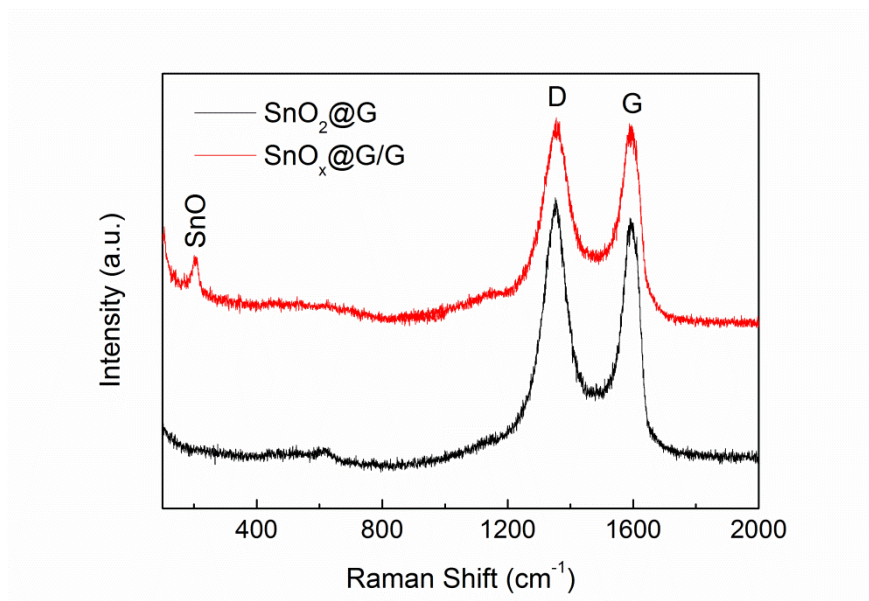

**Fig. S2** Raman spectra of SnO<sub>2</sub>@G and SnO<sub>x</sub>@G/G.

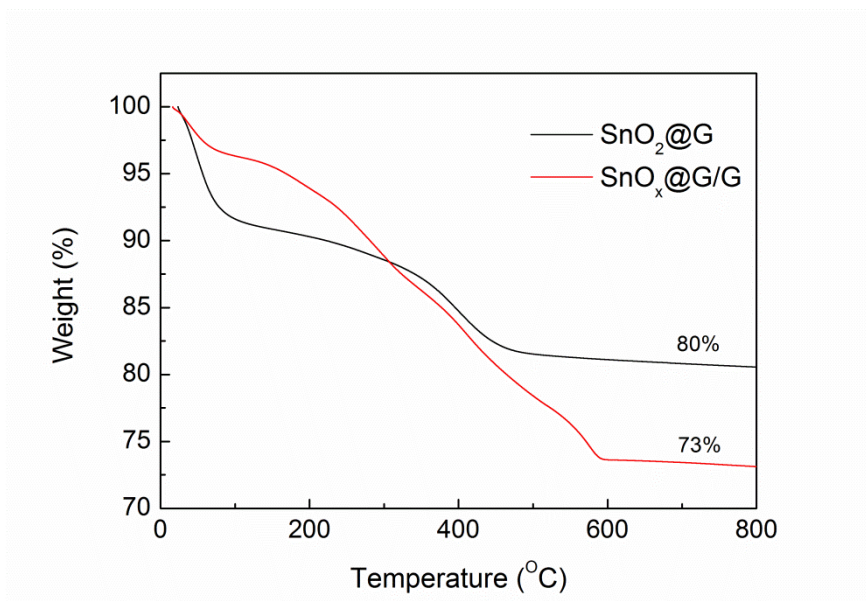

**Fig. S3** TGA curves of HCl washed-SnO<sub>x</sub>@G/G and SnO<sub>2</sub>@G under air atmosphere at a heating rate of 5 °C min<sup>-1</sup>.



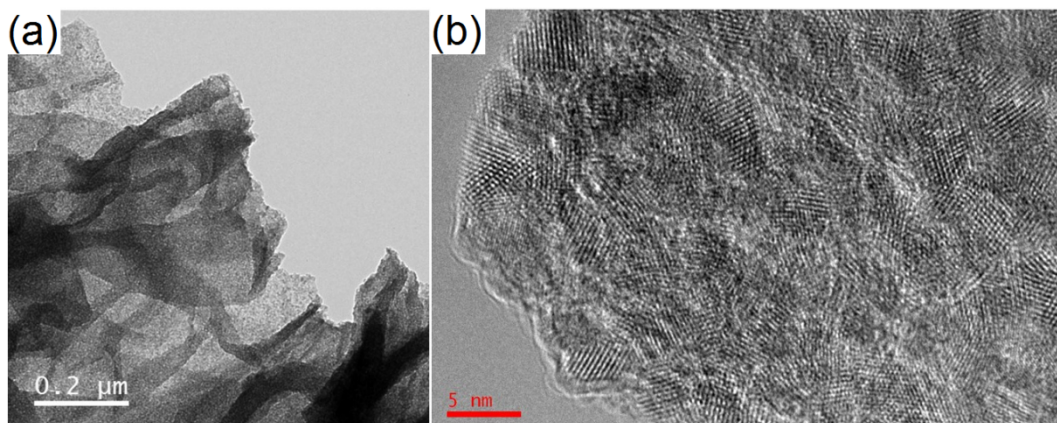

**Fig. S4** TEM images of SnO<sub>2</sub>@G.

### References

- [1] W. S. Hummers Jr, R. E. Offeman, *J. Am. Chem. Soc.*, 1958, **80**, 1339.
- [2] D. Wang, J. Yang, X. Li, D. Geng, R. Li, M. Cai, T. Sham and X. Sun, *Energy Environ. Sci.*, 2013, **6**, 2900-2906.
- [3] X. Chen, K. Wang, Y. Zhai, H. Zhang, X. Wu, X. Wei and J. Chen, *Dalton Trans.*, 2014, **43**, 3137-3143.
- [4] J. Zhu, G. Zhang, X. Yu, Q. Li, B. Lu and Z. Xu, *Nano Energy*, 2014, **3**, 80-87.
- [5] S. K. Park, S. Yu, N. Pinna, S. Woo, B. Jang, Y. Chung, Y. Cho, Y. Sung and Y. Piao, *J. Mater. Chem.*, 2012, **22**, 2520-2525.
- [6] J. Liu, J. Huang, L. Hao, H. Liu and X. Li, *Ceram. Int.*, 2013, 8623-8627.
- [7] S. Yang, W. Yue, J. Zhu, Y. Ren and X. Yang, *Adv. Funct. Mater.*, 2013, **23**, 3570-3576.
- [8] X. Wang, X. Cao, L. Bourgeois, H. Guan, S. Chen, Y. Zhong, D. Tang, H. Li, T. Zhai, L. Li, Y. Bando and D. Golberg, *Adv. Funct. Mater.*, 2012, **22**, 2682-2690.
